# Supplementary material for: Genome-Wide Association Study on Root Traits Under Different Growing Environments in Wheat (Triticum aestivum L.)
Source: PubMed Central journal article supplement (PMC8222912; doi:10.3389/fgene.2021.646712), 2021-06-10
Supplement: Image_1.pdf [file Image_1.pdf]

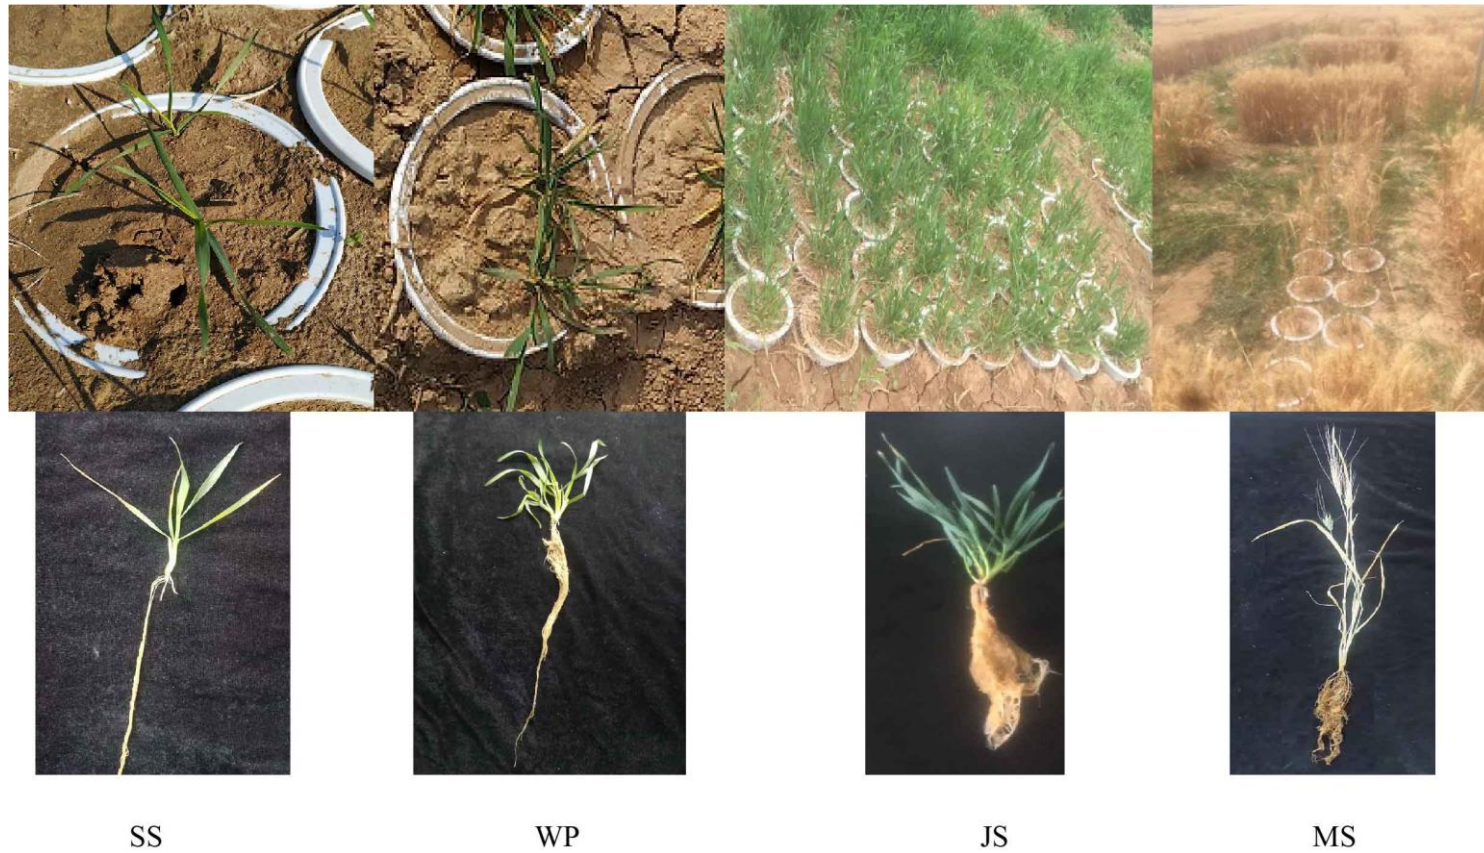

**FIGURE S1** Wheat under OPC growth at different stages. SS, seedling stage; WP, wintering period; JS, jointing stage; MS, mature stage.
