# Supplementary material for: Genome-Wide Association Study on Root Traits Under Different Growing Environments in Wheat (Triticum aestivum L.)
Source: PubMed Central journal article supplement (PMC8222912; doi:10.3389/fgene.2021.646712), 2021-06-10

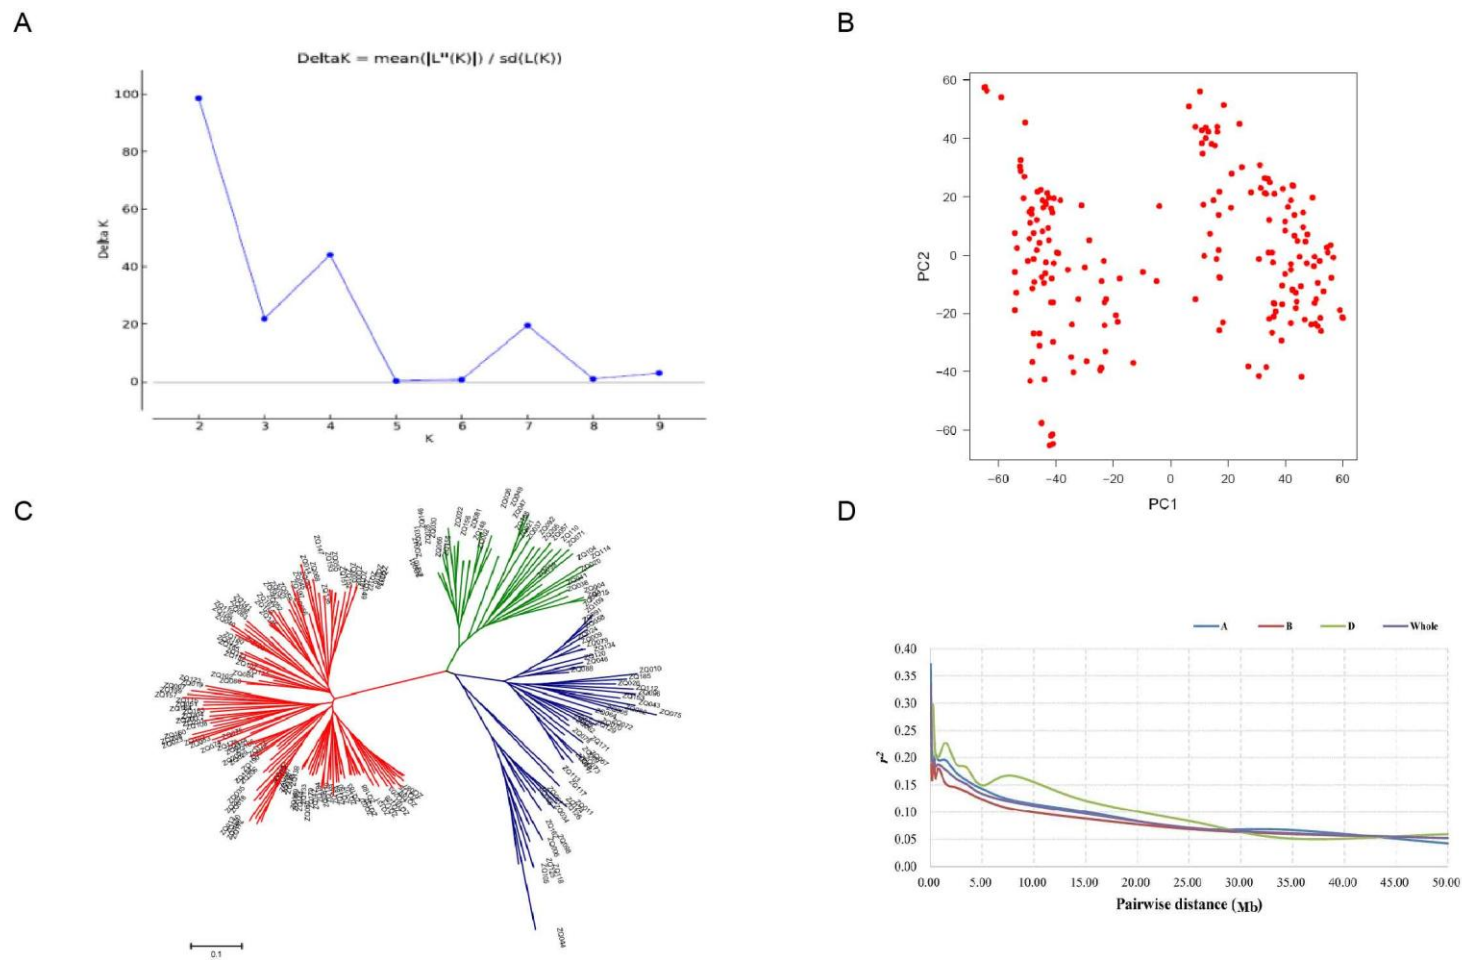

Supplement: Image_3.pdf [file Image_3.pdf]
