# Supplementary material for: Genome-Wide Association Study on Root Traits Under Different Growing Environments in Wheat (Triticum aestivum L.)
Source: PubMed Central journal article supplement (PMC8222912; doi:10.3389/fgene.2021.646712), 2021-06-10
Supplement: Image_4.pdf [file Image_4.pdf]

IHC-TRL

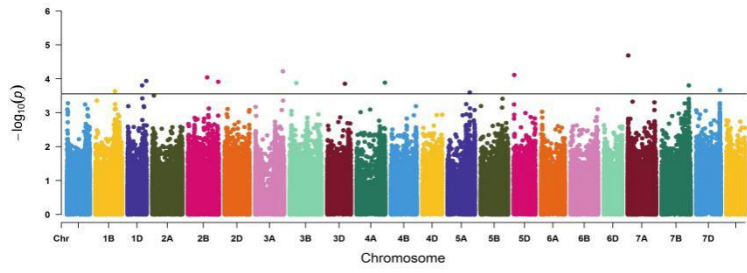

IHC-TRL

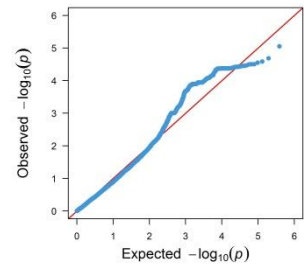

IHC-TRA

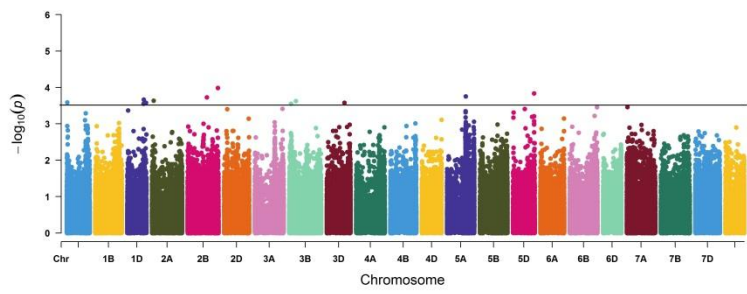

IHC-TRA

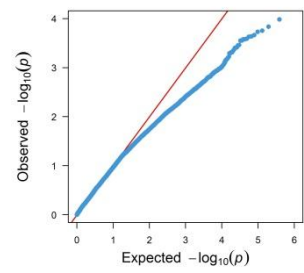

IHC-ARD

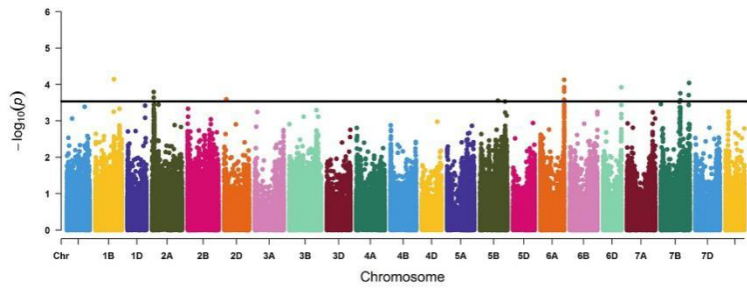

IHC-ARD

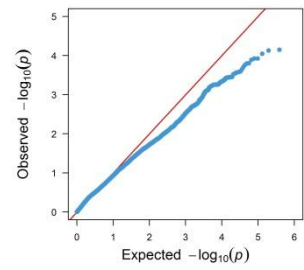

IHC-TRV

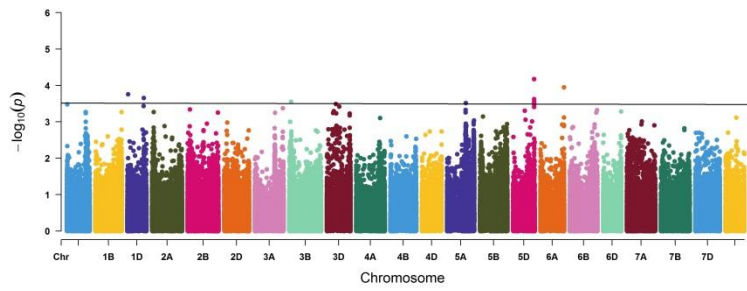

IHC-TRV

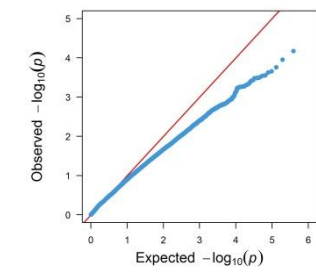

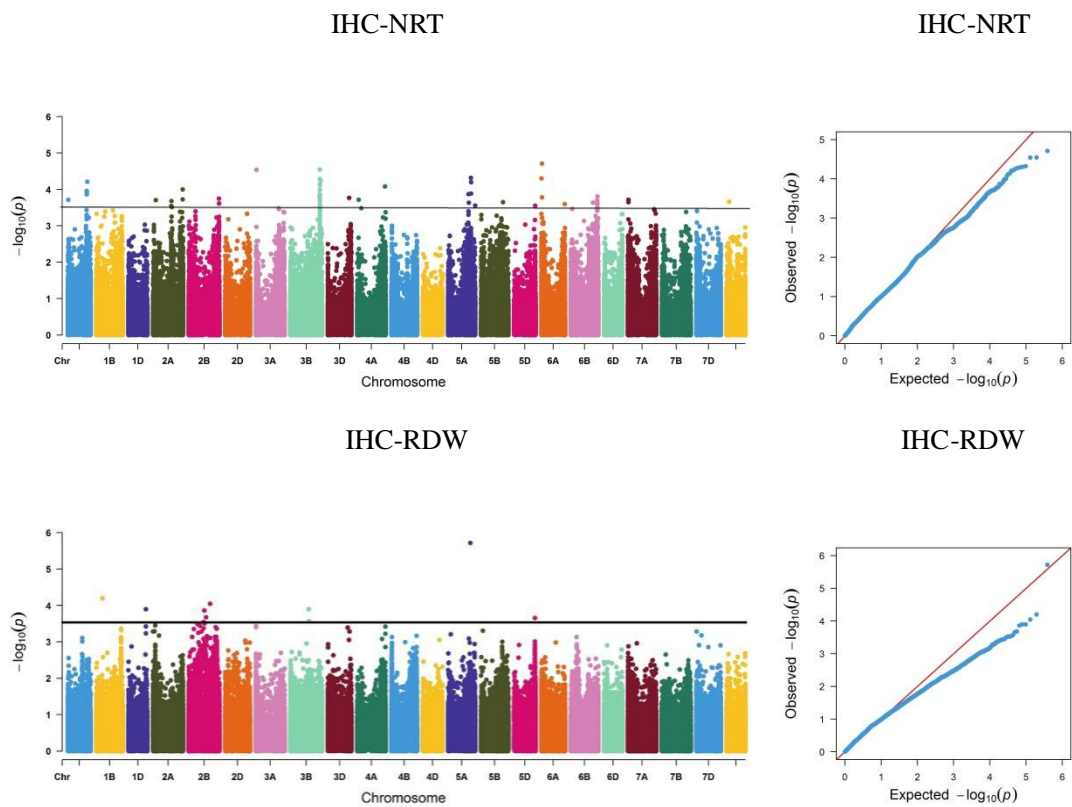

**FIGURE S4-1** Manhattan and QQ-plots for six root traits in indoor hydroponic culture (IHC).

OHC-TRL

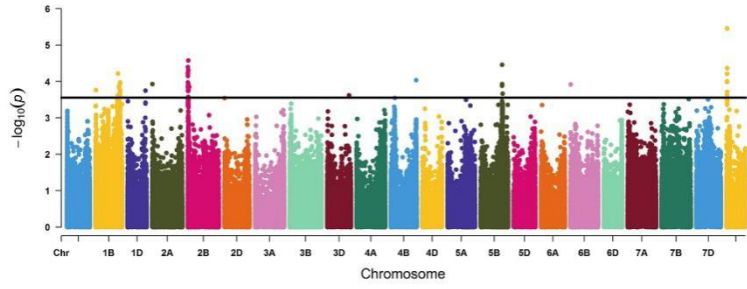

OHC-TRL

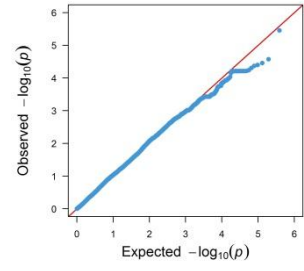

OHC-TRA

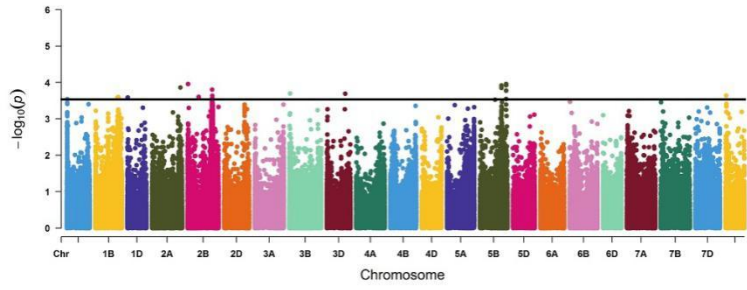

OHC-TRA

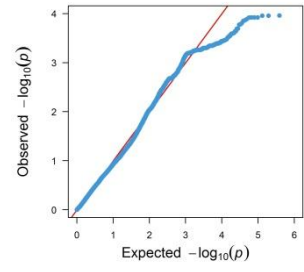

OHC-ARD

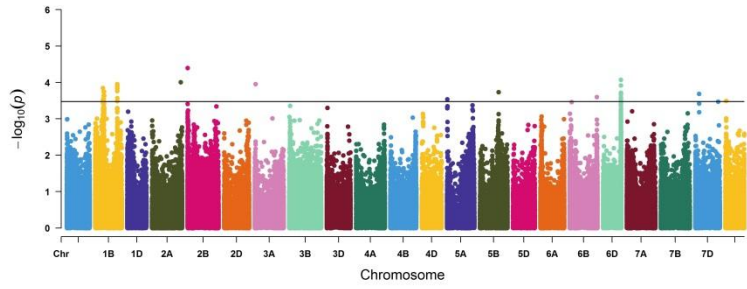

OHC-ARD

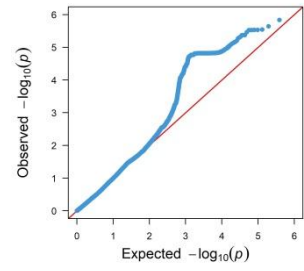

OHC-TRV

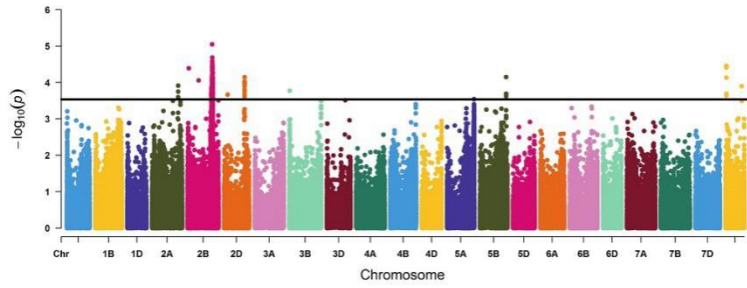

OHC-TRV

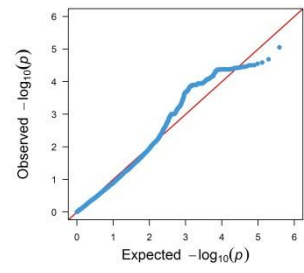

OHC-NRT

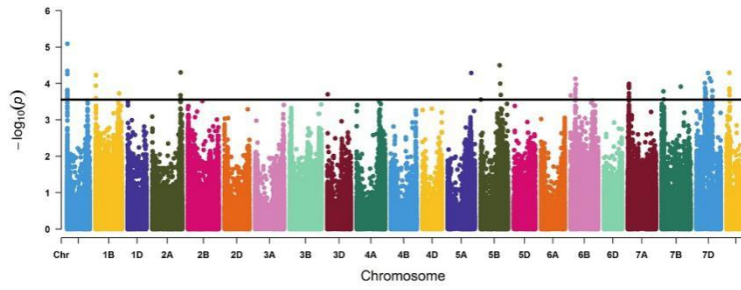

OHC-NRT

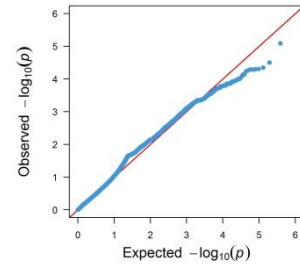

OHC-RDW

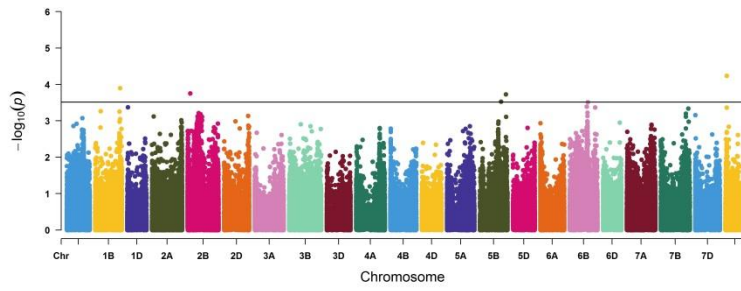

OHC-RDW

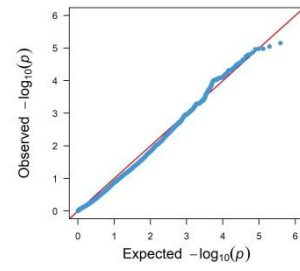

**FIGURE S4-2** Manhattan and QQ-plots for 6 root traits in outdoor hydroponic culture (OHC).

OPC-TRL

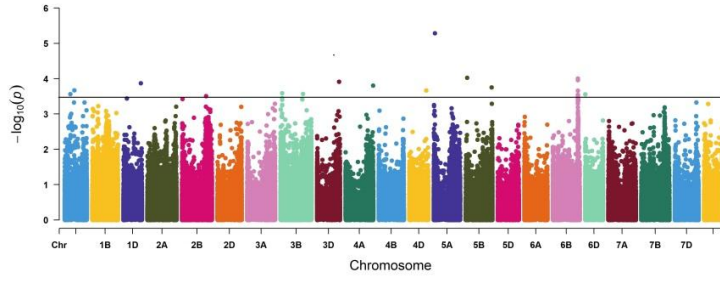

OPC-TRL

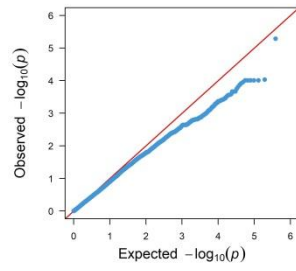

OPC-TRA

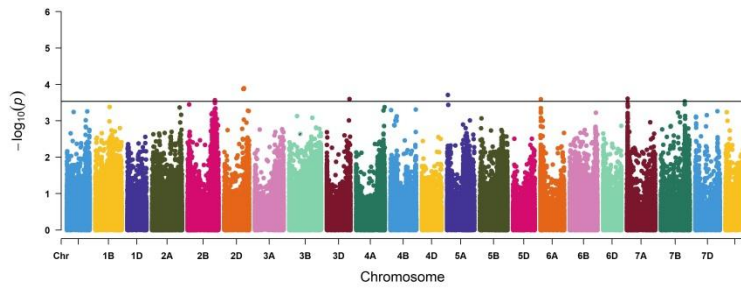

OPC-TRA

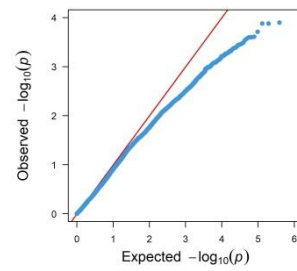

OPC-ARD

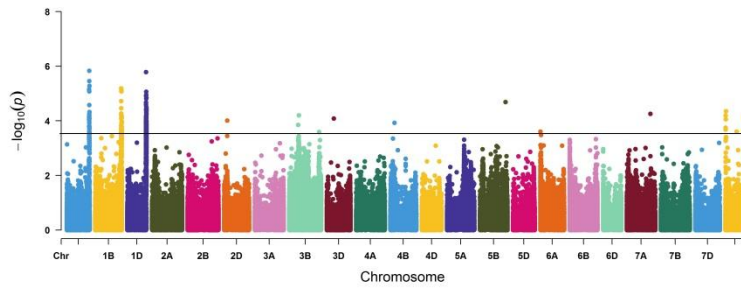

OPC-ARD

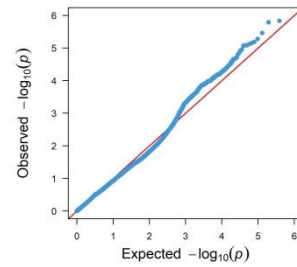

OPC-TRV

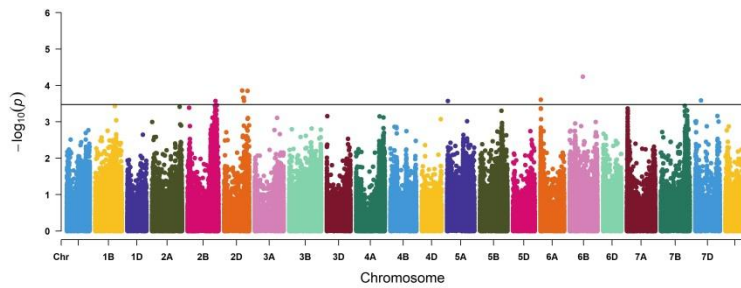

OPC-TRV

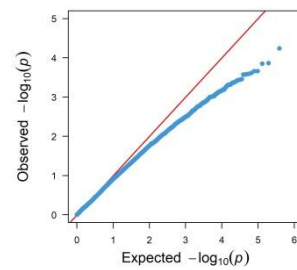

OPC-NRT

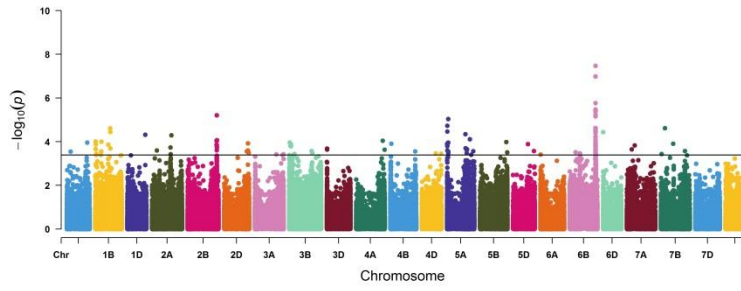

OPC-NRT

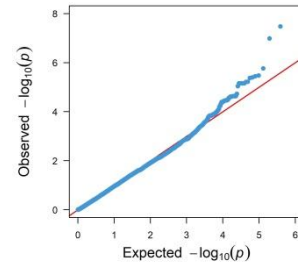

OPC-RDW

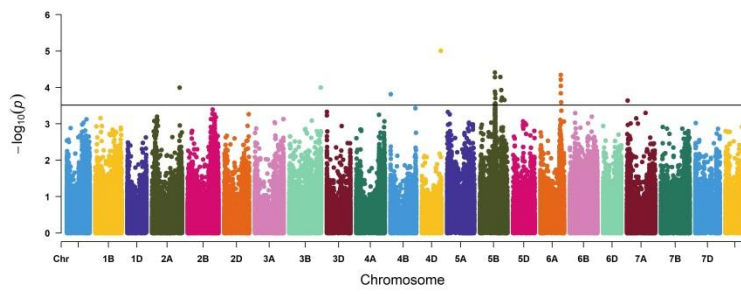

OPC-RDW

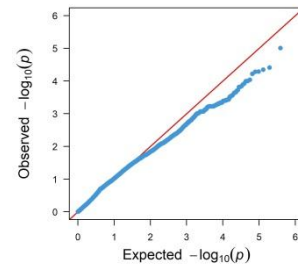

**FIGURE S4-3** Manhattan and QQ-plots for root traits under outdoor pot culture (OPC).
