# Supplementary material for: Genome-Wide Association Study on Root Traits Under Different Growing Environments in Wheat (Triticum aestivum L.)
Source: PubMed Central journal article supplement (PMC8222912; doi:10.3389/fgene.2021.646712), 2021-06-10
Supplement: Image_5.pdf [file Image_5.pdf]

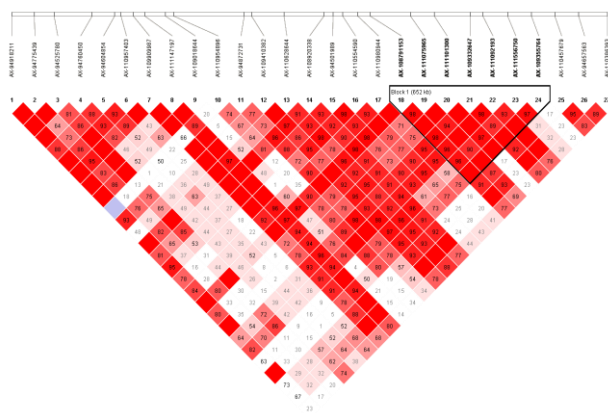

**A**

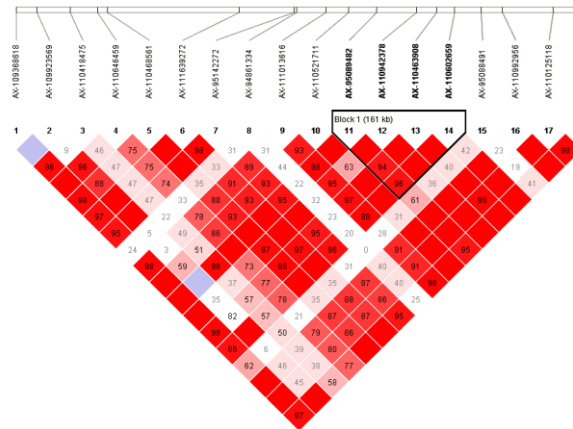

**B**

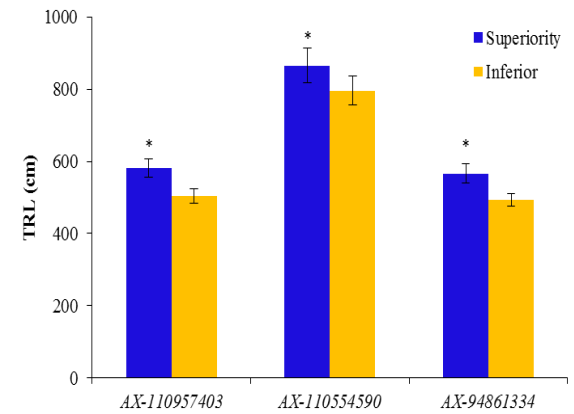

**C**

**FIGURE S5** Two haploblocks for local LD decay within the candidate region on chromosome 4A for TRL and phenotypic effect of allele variation.
